# Supplementary material for: Is Maternal Carbohydrate Intake Having an Impact on Newborn Birth Weight? A Systematic Review
Source: MDPI journal article supplement (doi:10.3390/nu15071649), 2023-03-28
Supplement: s1 [file s1]

**Table S1.** Characteristics of included studies, ordered by year of publication.

| Study                            | Study period                         | Country        | Setting                                                                                                                                   | Study design                                          |
|----------------------------------|--------------------------------------|----------------|-------------------------------------------------------------------------------------------------------------------------------------------|-------------------------------------------------------|
| Godfrey et al., 1996 [17]        | NR                                   | United Kingdom | Midwives' booking clinic at the Princess Anne Maternity Hospital, Southampton                                                             | Prospective cohort; Single-center study               |
| Mathews et al., 1999 [18]        | May, 1994 to February 1996           | United Kingdom | Antenatal booking clinics at St Mary's Hospital, Portsmouth, and its annexes                                                              | Prospective cohort; Multicenter study                 |
| Langley-Evans et al., 2003 [19]  | January, 2001 to unknown end date    | United Kingdom | Antenatal ultrasound dating scan clinic at Northampton General Hospital                                                                   | Prospective cohort; Single-center study               |
| Lagiou et al., 2004 [20]         | March, 1994 to October, 1995         | United States  | Antenatal clinic at University Hospital in Boston                                                                                         | Prospective cohort; Single-center study               |
| Moore et al., 2004 [21]          | October, 1998 to April, 2000         | Australia      | An antenatal clinic at a public hospital and through the offices of 3 privately practicing obstetricians in Adelaide                      | Prospective cohort; Multicenter study                 |
| Denguezli et al., 2009 [22]      | October, 2002 to February, 2003      | Tunisia        | Department of Obstetrics and Gynaecology. University Hospital Fattouma Bourguiba, Monastir                                                | Retrospective case-control; Single-center study       |
| Bawadi et al., 2010 [23]         | NR                                   | Jordan         | Women's hospital, Northern Jordan                                                                                                         | Retrospective cross-sectional, Single-center study    |
| Watson and McDonald, 2010 [24]   | NR                                   | New Zealand    | Maternal clinics, Northern New Zealand                                                                                                    | Prospective cohort; Multicenter study                 |
| Crume et al., 2016 [25]          | Unknown start date to November, 2013 | United States  | Prenatal, obstetric clinics at the University of Colorado Hospital                                                                        | Prospective cohort; Single-center study               |
| Diemert et al., 2016 [26]        | 2011 to 2013                         | Germany        | University Medical Centre Hamburg, Eppendorf                                                                                              | Prospective cohort; Single-center study               |
| Pathirathna et al., 2017 [27]    | October, 2015 to June, 2016          | Sri Lanka      | Antenatal clinics at Teaching Hospital, Kurunegala                                                                                        | Prospective cohort; Single-center study               |
| Grandy et al., 2018 [28]         | July, 2012 to August, 2013           | United States  | Obstetrics Clinic, Oregon Health and Science University                                                                                   | Prospective cohort; Single-center study               |
| Hjertholm et al., 2018 [29]      | August, 2013 to September, 2013      | Malawi         | Nankumba Traditional Authority of Mangochi District                                                                                       | Prospective cross-sectional; Cluster study            |
| Sharma et al., 2018 [30]         | September, 2003 to June, 2006        | United Kingdom | Two large teaching hospitals in Leeds                                                                                                     | Prospective cohort; Multicenter study                 |
| Amezcu-Prieto et al., 2019 [31]  | May, 2012 to July, 2015              | Spain          | Five hospitals of Eastern Andalusia                                                                                                       | Retrospective matched case-control; Multicenter study |
| Eshak et al., 2020 [32]          | 2011 to 2014                         | Japan          | Local governmental offices that issue pregnancy and child follow-up handbooks and/or obstetric facilities in fifteen Japanese communities | Prospective cohort; Multicenter study                 |
| Minato-Inokawa et al., 2020 [33] | May, 2015 to July, 2017              | Japan          | Department of Obstetrics and Gynecology, National Hospital Organization Kyoto Medical Center, Japan                                       | Prospective cohort; Single-center study               |

NR: not reported
