# Supplementary material for: Is Maternal Carbohydrate Intake Having an Impact on Newborn Birth Weight? A Systematic Review
Source: MDPI journal article supplement (doi:10.3390/nu15071649), 2023-03-28
Supplement: s1 [file s1]

**Table S2.** Characteristics of study participants.

| Study                           | Sample size (Maternal and newborn pairs) | Maternal characteristics                                                                                                       |                                                                     |                                                                                                                                         |                 |                             |                                                              | Newborn characteristics                     |                                         |
|---------------------------------|------------------------------------------|--------------------------------------------------------------------------------------------------------------------------------|---------------------------------------------------------------------|-----------------------------------------------------------------------------------------------------------------------------------------|-----------------|-----------------------------|--------------------------------------------------------------|---------------------------------------------|-----------------------------------------|
|                                 |                                          | Overall characteristics                                                                                                        | Age (years) <sup>a</sup>                                            | Pre-pregnancy BMI (kg/m <sup>2</sup> ) <sup>a</sup>                                                                                     | Primiparous (%) | Smoked during pregnancy (%) | Alcohol consumption (%)                                      | Birth weight (g) <sup>a</sup>               | Gestational age (weeks) <sup>a</sup>    |
| Godfrey et al., 1996 [17]       | 538                                      | Caucasian women aged 16 years or older with singleton pregnancies                                                              | 26.4 ± 4.9                                                          | 23.1 ± 4.4                                                                                                                              | 53.0            | 25.8                        | NR                                                           | Male: 3527 ± 496;<br>Female: 3344 ± 463     | 40.2 ± 1.3                              |
| Mathews et al., 1999 [18]       | 693                                      | Nulliparous Caucasian women with singleton pregnancies                                                                         | 25.8 ± 4.9                                                          | 23.2 ± 3.9                                                                                                                              | NR              | 40.7                        | NR                                                           | Male: 3425 ± 480;<br>Female: 3281 ± 433     | Male: 40.1 ± 1.4;<br>Female: 40.2 ± 1.3 |
| Langley-Evans et al., 2003 [19] | 226                                      | Healthy Caucasian women                                                                                                        | 27.9 ± 5.2                                                          | 25.4 ± 5.2                                                                                                                              | NR              | 16.9                        | NR                                                           | Male: 3547 ± 459;<br>Female: 3403 ± 517     | Male: 40.1 ± 1.0;<br>Female: 40 ± 1.3   |
| Lagiou et al., 2004 [20]        | 224                                      | Caucasian women aged less than 40 years and have a parity of no more than two                                                  | 18-24 y: 2.2%;<br>25-29 y: 27.7%;<br>30-34 y: 61.6%;<br>35+ y: 8.5% | <18 kg/m <sup>2</sup> : 11.6%;<br>19-21 kg/m <sup>2</sup> : 48.7%;<br>22-24 kg/m <sup>2</sup> : 26.3%;<br>>25 kg/m <sup>2</sup> : 13.4% | 61.6            | 4.9                         | 2.7                                                          | Male: 3629 ± SE 40,<br>Female: 3498 ± SE 48 | NR                                      |
| Moore et al., 2004 [21]         | 556                                      | Caucasian women aged 18 years or above with singleton pregnancy in which conception occurred without treatment for infertility | 29.0 ± 5.0                                                          | 24.9 ± 5.7                                                                                                                              | 33.6            | 19.6                        | None of the women reported consuming > 2 drinks/ day (% NR). | Male: 3500 ± 472;<br>Female: 3349 ± 574     | Male: 39.5 ± 1.5;<br>Female: 39.4 ± 1.8 |

|                                 |                             |                                                                                                                                                                                                                   |                                              |                                              |                         |                         |                                                                    |                    |                                              |
|---------------------------------|-----------------------------|-------------------------------------------------------------------------------------------------------------------------------------------------------------------------------------------------------------------|----------------------------------------------|----------------------------------------------|-------------------------|-------------------------|--------------------------------------------------------------------|--------------------|----------------------------------------------|
| Denguezli et al., 2009 [22]     | 350<br>(52 CAs,<br>298 COs) | Tunisian pregnant women with singleton pregnancies who delivered at term.<br>CAs- women who delivered a newborn with a birth weight $\geq 4000$ g;<br>COs- women who delivered a newborn with normal birth weight | CAs: $29.9 \pm 4.6$ ;<br>COs: $28.7 \pm 5.5$ | CAs: $28.2 \pm 5.3$ ;<br>COs: $25.5 \pm 4.2$ | CAs: 17.3;<br>COs: 30.9 | NR                      | NR                                                                 | NR                 | CAs: $40.4 \pm 1.2$ ;<br>COs: $39.5 \pm 1.4$ |
| Bawadi et al., 2010 [23]        | 700                         | Healthy women of 18 years or older who had completed vaginal labor 24 to 48 hours                                                                                                                                 | $28.7 \pm SE 15.7$                           | $24.2 \pm SE 0.2$                            | 24                      | NR                      | NR                                                                 | $3200 \pm SE 20$   | $36.7 \pm SE 0.2$                            |
| Watson and McDonald, 2010 [24]  | 439                         | Healthy European and Polynesian women with a singleton pregnancy                                                                                                                                                  | $31.2 \pm 5.1$                               | NR                                           | NR                      | 11.4                    | NR                                                                 | $3551 \pm 544$     | NR                                           |
| Crume et al., 2016 [25]         | 1040                        | Healthy pregnant women                                                                                                                                                                                            | $27.9 \pm 6.1$                               | $25.5 \pm 6.1$                               | 64.1                    | 8.7                     | NR                                                                 | $3283.2 \pm 432.5$ | $39.6 \pm 1.1$                               |
| Diemert et al., 2016 [26]       | 200                         | Healthy low-risk women of age 18 or older with singleton, spontaneously conceived pregnancy                                                                                                                       | $31.0 \pm 3.5$                               | $24.7 \pm 4.6$                               | 57 <sup>b</sup>         | -                       | -                                                                  | $3457.0 \pm 497.0$ | $40.0 \pm 1.5$                               |
| Pathirathna et al., 2017 [27]   | 126                         | Healthy women with a singleton pregnancy                                                                                                                                                                          | $28.8 \pm 6.2$                               | $22.1 \pm 4.3$                               | 35.7                    | NR                      | NR                                                                 | $2874.6 \pm 497.0$ | $38.8 \pm 1.5$                               |
| Grandy et al., 2018 [28]        | 41                          | Healthy women with a singleton pregnancy                                                                                                                                                                          | $30.9 \pm 5.8$                               | $29.7 \pm 7.1$                               | 59                      | NR                      | NR                                                                 | $3500 \pm 400$     | NR                                           |
| Hjertholm et al., 2018 [29]     | 132                         | Pregnant women                                                                                                                                                                                                    | NR                                           | NR                                           | NR                      | NR                      | NR                                                                 | $3,104 \pm 401$    | NR                                           |
| Sharma et al., 2018 [30]        | 1196                        | Low-risk pregnant women                                                                                                                                                                                           | $30 \pm 5$                                   | $25 \pm 5$                                   | 42                      | FT: 17;<br>ST: 12       | FT: $0.5 \pm 0.9$ <sup>c</sup> ;<br>ST: $0.2 \pm 0.4$ <sup>c</sup> | $3434 \pm 559$     | $40.0 \pm 2.0$                               |
| Amezcu-Prieto et al., 2019 [31] | 1036<br>(518 CAs, 518 COs)  | CAs- women who delivered a single live SGA newborn with no congenital malformations;<br>COs- women who delivered a single live AGA newborn with no congenital malformations                                       | NR                                           | CAs: $23.1 \pm 4.5$ ;<br>COs: $23.9 \pm 4.1$ | CAs: 63.9;<br>COs: 57.5 | CAs: 28.8;<br>COs: 15.4 | CAs: 18.5; COs: 15.2                                               | NR                 | NR                                           |

|                                  |       |                                       |                                                                        |                                                                                                                                                      |                                                         |     |     |                                                                           |                                                                           |
|----------------------------------|-------|---------------------------------------|------------------------------------------------------------------------|------------------------------------------------------------------------------------------------------------------------------------------------------|---------------------------------------------------------|-----|-----|---------------------------------------------------------------------------|---------------------------------------------------------------------------|
| Eshak et al., 2020 [32]          | 78793 | Women with a singleton pregnancy      | 31.0 ± 5.0                                                             | <18.5 kg/m <sup>2</sup> :<br>16.2%;<br>18.5-<25 kg/m <sup>2</sup> :<br>73.8%;<br>25-<30 kg/m <sup>2</sup> :<br>7.8%;<br>≥30 kg/m <sup>2</sup> : 2.2% | 39.6                                                    | 4.3 | 2.7 | NR                                                                        | 38.9 ± 1.5                                                                |
| Minato-Inokawa et al., 2020 [33] | 171   | Pregnant women aged 20 years or above | SGA group: 33.7±5.8;<br>AGA group: 31.3 ± 5.3;<br>LGA group:32.7 ± 6.5 | SGA group: 20.7 ± 3.1;<br>AGA group: 21.2 ± 3.1;<br>LGA group:21.6 ± 3.1                                                                             | SGA group: 41.2;<br>AGA Group: 44.4;<br>LGA group: 40.0 | NR  | NR  | SGA group: 2489 ± 217;<br>AGA group: 2966 ± 285;<br>LGA group: 3589 ± 356 | SGA group: 39.1 ± 1.1;<br>AGA group: 38.8 ± 1.2;<br>LGA group: 38.8 ± 1.8 |

<sup>a</sup> Mean ± Standard deviation if not mentioned otherwise. <sup>b</sup> Primi-gravida. <sup>c</sup> units/day. AGA: appropriate-for-gestational-age; BMI: body mass index; CAs: cases; COs: controls; FT: first-trimester; LGA: large-for-gestational-age; NR: not reported; SGA: small-for-gestational-age; SE: standard error of mean; ST: second-trimester.
